# Supplementary material
Source: PubMed Central journal article supplement (PMC2596221)
Supplement: 0806303105_0806303105SI.pdf [file 0806303105_0806303105SI.pdf]

# Supporting Information

Rostovtseva et al. 10.1073/pnas.0806303105

## SI Materials and Methods

**Protein Purification.** Frozen rat brains were thawed, homogenized in assembly buffer [0.1 M Mes, 1 mM EGTA, 1 mM MgCl<sub>2</sub> (pH 6.9)], and centrifuged at 100,000 × *g*. Microtubule protein (tubulin plus microtubule-associated proteins) was purified by several rounds of GTP-driven, temperature-dependent polymerization and depolymerization (1). Tubulin was then purified from this material by selective polymerization in high-buffer concentration, pelleted by centrifugation, redissolved in assembly buffer at 25 mg/mL, and drop-frozen in liquid nitrogen as in ref. 2. Tubulin from *Leishmania tarentolae* was purified as described in ref. 3 and was a kind gift from K. Werbovetz (Ohio State University, Columbus, OH).

**Single-Channel Current Analyses.** Current measurements were performed by using an Axopatch 200B amplifier (Axon Instruments) in the voltage-clamp mode. Data were filtered by a low-pass 8-pole Butterworth filter (model 9002; Frequency Devices) at 15 kHz and saved directly into the computer memory with a sampling frequency of 50 kHz as described in ref. 4. For data analysis, a digital 8-pole Bessel low-pass filter set at 500 Hz was applied to all records, and then individual events of current

blockages were discriminated. Lifetimes were calculated by fitting logarithmic single or double exponentials to logarithmically binned histograms of at least 200 blockage events (5). Nine different logarithmic probability fits were generated with different fitting procedures, and the mean ± SD of the fitted time constants was used as mean ± SD for the lifetime.

The voltage-dependent properties of the voltage-dependent anion channel (VDAC)-containing membrane were assessed by applying a symmetrical 5-mHz triangular voltage wave with ±60 mV amplitude from a Function Waveform Generator Hewlett-Packard 33120A and recording the current by using a Digidata 1322A (Axon Instruments). Data acquisition and analysis were done as described in ref. 4.

**Mitochondria Isolation.** Male Wistar rats (250–300 g) were used throughout the study. Brain mitochondria were isolated from the forebrains as described in ref. 6. Cardiac mitochondria were isolated from rat hearts by a method described in ref. 7 by using successive treatments of heart tissue homogenates by trypsin and trypsin inhibitor. The final mitochondrial pellet was suspended in 2 mL of Mitomed solution [0.5 mM EGTA, 3 mM MgCl<sub>2</sub>, 60 mM potassium lactobionate, 20 mM taurine, 3 mM KH<sub>2</sub>PO<sub>4</sub>, 20 mM Hepes, 110 mM sucrose, 0.5 mM DTT (pH 7.1)].

1. Sackett DL, Knipling L, Wolff J (1991) *Protein Expr Purif* 2:390–393.

2. Wolff J, Sackett DL, Knipling L (1996) Cation selective promotion of tubulin polymerization by alkali metal chlorides. *Protein Sci* 5:2020–2028.

3. Yakovich AJ, Ragone FL, Alfonso JD, Sackett DL, Werbovetz KA (2006) *Exp Parasitol* 114:289–296.

4. Rostovtseva TK, Kazemi N, Weinrich M, Bezrukov SM (2006) Voltage gating of VDAC is regulated by nonlamellar lipids. *J Biol Chem* 281:37496–37506.

5. Sigworth FJ, Sine SM (1987) *Biophys J* 52:1047–1054.

6. Booth RF, Clark JB (1978) A rapid method for the preparation of relatively pure metabolically competent synaptosomes from rat brain. *Biochem J* 176:365–370.

7. Saks VA, Chernousova GB, Gukovsky DE, Smirnov VN, Chazov EI (1975) *Eur J Biochem* 57:273–290.



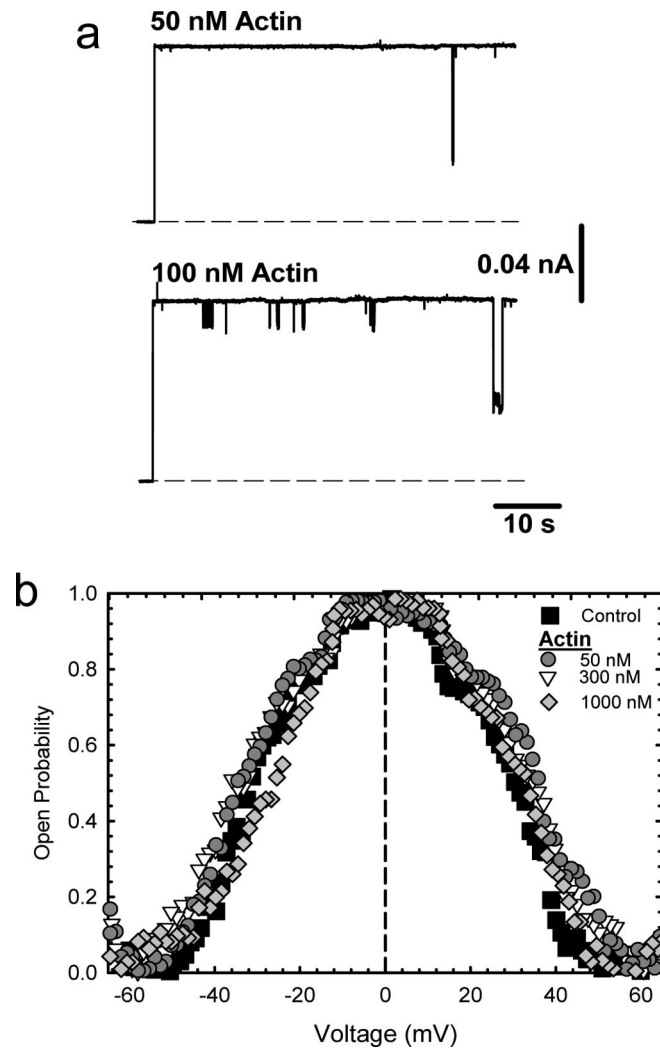

**Fig. S2.** Actin does not block VDAC channel or change VDAC gating parameters. (a) Actin (50 or 100 nM) added to the *cis* side of the membrane does not block channel conductance. Current traces through the single VDAC channel were obtained at  $-25$  mV applied potential. Experimental conditions were as in Fig. 3A. (b) Actin (50, 300, or 1,000 nM) added to both sides of the membrane containing 30 channels does not affect VDAC gating. Open probability is defined as in Fig. S1b. The medium consisted of 1 M KCl, buffered with 5 mM Hepes at pH 7.4. VDAC was isolated from *Neurospora crassa* mitochondria. Bilayer membranes were formed from asolectin with 10% cholesterol.

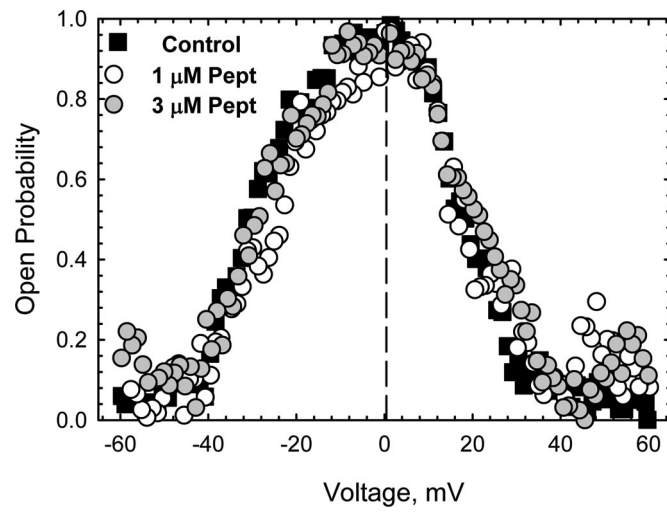

**Fig. S3.** VDAC voltage gating is not affected by CTT synthetic peptides. Mixtures of 1 and 3  $\mu\text{M}$   $\alpha$ - and  $\beta$ -tubulin CTT synthetic peptides were added to both sides of the membrane. Experimental conditions were as in Fig. 3B.

a

| Species                               | Accession    | Sequence              |
|---------------------------------------|--------------|-----------------------|
| <b>Eukaryotes with mitochondria</b>   |              |                       |
| <i>Homo sapiens</i> (Ka-1)            | NM_006082    | VGVDVSRGGGEEGGEEY     |
| <i>Gallus gallus</i>                  | CAA30852     | VGLDSYEDDEEGEE        |
| “ (a2)                                | XM_419249    | VGTDSMFGEDDEGGEEY     |
| “ (a8)                                | NM_205444    | VATDLFEDENRAGDS       |
| <i>Danio rerio</i>                    | AAB84143     | VGAESVFGEDDEGGEEY     |
| <i>Notophthalmus viridescens</i>      | Q91060       | VGLDSYFGEEDEGGEEY     |
| <i>Xenopus laevis</i>                 | P08537       | VGADSAEAEDDEGGEEY     |
| <i>Brugia malayi</i>                  | XP_001899189 | VGIDSLFGEDDEGGEEY     |
| <i>Drosophila melanogaster</i> (a85E) | NM_079573    | VGIDSTTELGGDEEEY      |
| “ (a67C)                              | NM_079285    | VGLDNAEEGGDEDFEEF     |
| <i>Homarus americanus</i>             | Q94570       | VGIDTAFGEDDEEAAEY     |
| <i>Aplysia californica</i>            | Q8T6A5       | VGVDVSRGGGDEGGEEY     |
| <i>Arabidopsis thaliana</i>           | NM_121983    | VGAEGGDDEEDEGGEEY     |
| <i>Triticum aestivum</i>              | P14640       | VGAEFDGEGDEGGEEY      |
| <i>Zea mays</i>                       | P22275       | VAAEGGSDGGDEEEY       |
| <i>Leishmania tarentolae</i>          | ABC40566     | VGAESAEDMGSEEDVEEY    |
| <i>Toxoplasma gondii</i>              | P10873       | VGIETAEGGEEEGYGGEEY   |
| <i>Blepharisma japonicum</i>          | Q08629       | VGIETAFAFGEEEGYGGEEEL |
| <i>Tetrahymena thermophila</i>        | AAA21350     | VGIETAEGGEEEGY        |
| <i>Saccharomyces cerevisiae</i>       | NP_013625    | VGADSYAEDEEF          |
| <i>Schizosaccharomyces pombe</i>      | CAA16866     | VGGDSMDNEMYLADDEY     |
| <i>Neurospora crassa</i>              | P38668       | VAGDYNLDVDEAEY        |
| <i>Schizophyllum commune</i>          | CAA60035     | VGTDSAFAEEDGGEEY      |
| <i>Dictyostelium discoideum</i>       | P32255       | VSASTEGERQEEY         |
| <i>Pelvetia fastigiata</i>            | Q40831       | VGAETAEGGDEEFGEEY     |
| <i>Euglena gracilis</i>               | P33625       | VGAESAEDVEGSEEDVEEY   |

**Fig. S4.** Sequence alignment of tubulin CTT from various species. The species name and accession number are given for each sequence, followed by the sequence. All sequences are aligned by using the C terminus of the final helix in the crystal structure; these residues begin each sequence line. The space in each line indicates the end of the residues resolved in the crystal structure and the beginning of the CTT. The structures used were Protein Data Base (PDB) ID code 1JFF for all eukaryotic tubulins and PDB ID code 2BTQ for the bacterial tubulins.  $\alpha$ -Tubulin CTT sequences are in a, and  $\beta$ -tubulin CTT sequences are in b. Many species have multiple genes for  $\alpha$  and  $\beta$ . In these cases, the sequence shown is one that is similar to the average character shown in Fig. 6B in the text.

|                                                                     |              |                                                |
|---------------------------------------------------------------------|--------------|------------------------------------------------|
| <i>Naegleria gruberi</i>                                            | P11237       | VGTESQ EGDGEEGEDGGDQ                           |
| <b>Eukaryotes lacking mitochondria – near normal CTT</b>            |              |                                                |
| <i>Giardia lamblia</i>                                              | XP_001706843 | IGAETL GDGEEDMEEDDAY                           |
| <i>Trichomonaas vaginalis</i>                                       | XP_001330666 | VAAESV EGGDEEDGGEM                             |
| <i>Encephalitozoon intestinalis</i>                                 | AAN78301     | IGAETL GDGEEDMEEDDAY                           |
| <b>Eukaryotes lacking mitochondria – truncated or decharged CTT</b> |              |                                                |
| <i>Guillardia theta</i>                                             | Q9SCC8       | VGSESQ ELISNSFF                                |
| <i>Hemiselmis andersenii</i>                                        | XP_001712353 | VGNENN EDILLY                                  |
| <i>Encephalitozoon cuniculi</i>                                     | NP_586048    | ISSNAE PVDEY                                   |
| <i>Entamoeba dispar</i>                                             | XP_001739532 | LAI DNT VEGESMTAQ                              |
| <b>Bacteria</b>                                                     |              |                                                |
| <i>Prostheco bacter dejongei</i> (BTubA)                            | AAO12155     | YQVAEE SGAKAVQESAGDTGMFAAAAGVSDIARGMSLRILVDRRE |
| “ (BTubB)                                                           | AAO12159     | SYRDAS                                         |
| <i>Prostheco bacter vanneervenii</i> (BTubA)                        | CAJ14012     | YQVAEE SGAKAVQESADYPSASSASSDSSSGMSLRILVDRRA    |
| “ (BTubB)                                                           | CAJ14013     | SYRDAS                                         |
| <i>Prostheco bacter debontii</i> (BTubA)                            | AM041149     | YQVAEE SGAKAVIQVSGSTVSSSSMDDPSTMSLRILVDRRE     |
| “ (BTubB)                                                           | AM041149     | SYRDAS                                         |

Fig. S4a. Continued.

b

| Species                                                  | Accession    | Sequence                             |
|----------------------------------------------------------|--------------|--------------------------------------|
| <b>Eukaryotes with mitochondria</b>                      |              |                                      |
| <i>Homo sapiens</i>                                      | AAB59507     | QQYQD ATADEQQGFEEFGEDEA              |
| <i>Gallus gallus</i> (b2b)                               | NM_001004400 | QQYQD ATADEQQGFEEFFEEDEA             |
| “ (b6)                                                   | NM_001031012 | QQYQE ATANDEGEAFEDDEEINE             |
| <i>Danio rerio</i>                                       | NP_001070241 | QQYQE ATADDEAFEGEEGE                 |
| <i>Xenopus laevis</i>                                    | P13602       | QQYQD ATADEQQGFEEFEDEA               |
| <i>Brugia malayi</i>                                     | XP_001896615 | QQYQD ATADEEQQLQEGSEYIQEE            |
| <i>Drosophila melanogaster</i> (56D)                     | NP_523795    | QQYQE ATADEGAEFEEEQEAVDEN            |
| “ (97EF)                                                 | NP_65166     | QQYQE ATADDFVFFDDEQAEQ               |
| <i>Homarus americanus</i>                                | Q25009       | QQYQE ATADDEAFEEFGFVGEYA             |
| <i>Aplysia californican</i>                              | AAP13560     | QQYQD ATAEDEGFDEEEGDEGEEYA           |
| <i>Arabidopsis thaliana</i>                              | BAB10059     | QQYQD ATADEEEGYEEDEVEVQEEQ           |
| <i>Triticum aestivum</i>                                 | AAD10492     | QQYQD ATADEEELLYEDEDDALQE            |
| <i>Zea mays</i>                                          | Q43695       | QQYQD ATAEYDEEEQNGEEHH               |
| <i>Leishmania tarentolae</i>                             | ABC40567     | QQYQD ATVEEEGEYDEEEPT                |
| <i>Toxoplasma gondii</i>                                 | P10878       | QQYQD ATAEEEGFDEEEGEMGAEEGA          |
| <i>Tetrahymena thermophila</i>                           | P41352       | QQYQD ATAEEEGFEEEEGEN                |
| <i>Saccharomyces cerevisiae</i>                          | P02557       | QQYQE ATVEDDEEVDENGDFGAPQNDPEPITINFE |
| <i>Schizosaccharomyces pombe</i>                         | P05219       | QQYQE AGIDEGDEDYPIEEKIPLEY           |
| <i>Neurospora crassa</i>                                 | XP_957669    | QQYQD AQVDEEEYEEEAPELGEF             |
| <i>Schizophyllum commune</i>                             | CAA44972     | QQYQD ATVEEEGEYEEVIEDGE              |
| <i>Dictyostelium discoïdium</i>                          | P32256       | QQYSN QETEEEGGYQEFHEHSEQAN           |
| <i>Ectocarpus variabilis</i>                             | AAA33284     | QQYQD ATAEEEGFDEDEELDLAMG            |
| <i>Euglena gracilis</i>                                  | P12457       | QQYQD ATVEEEGEFDDEEDVQY              |
| <i>Naegleria gruberi</i>                                 | P34108       | QQYQD ATAEEEGFDEENFGAQEEQPAAY        |
| <b>Eukaryotes lacking mitochondria – near normal CTT</b> |              |                                      |

Fig. S4b





**Table S1. Parameters describing VDAC gating are changed in the presence of tubulin but not tubulin-S**

| Tubulin            | Negative $V_0$ ,<br>mV | $n$ at negative potentials | Positive $V_0$ ,<br>mV | $n$ at positive potentials |
|--------------------|------------------------|----------------------------|------------------------|----------------------------|
| Control (7)        | $-24.8 \pm 3.2$        | $2.9 \pm 0.4$              | $23.8 \pm 5.7$         | $2.9 \pm 0.5$              |
| Intact tubulin (4) | $-13.6 \pm 3.2$        | $4.1 \pm 0.4$              | $13.5 \pm 4.5$         | $3.9 \pm 0.8$              |
| Tubulin-S (5)      | $-25.9 \pm 3.6$        | $2.5 \pm 0.8$              | $28.4 \pm 1.2$         | $2.9 \pm 1.1$              |

The gating parameters  $V_0$  and  $n$  were obtained from the experiments shown in [SI Fig. S1b](#) and calculated as described in ref. 4. In the presence of 50 nM tubulin  $V_0$ , a characteristic voltage at which half-channels are open and half-closed, was shifted by 10 mV toward smaller potentials, and the gating charge,  $n$ , increased slightly from 3 to 4. In contrast, there was no measurable effect of 50 nM tubulin-S on VDAC voltage-gating parameters. Values are means  $\pm$  SE. The number of experiments is shown in parentheses.
